# Supplementary material
Source: HighWire-hosted journal article supplement (http://cmajopen.ca/highwire/filestream/87350/field_highwire_adjunct_files/0/2020-0231-1-at.pdf)
Supplement: 2020-0231-1-at.pdf [file 2020-0231-1-at.pdf]

Appendix 1: Criteria for assigning EOSS stages

| COMORBIDITY                                                                                                                                                         | EOSS STAGES <sup>1</sup>                            |                                                                                                 |                                                                  |                                       |
|---------------------------------------------------------------------------------------------------------------------------------------------------------------------|-----------------------------------------------------|-------------------------------------------------------------------------------------------------|------------------------------------------------------------------|---------------------------------------|
|                                                                                                                                                                     | 0                                                   | 1                                                                                               | 2                                                                | 3                                     |
| <b>LIVER DISEASE</b><br><ul style="list-style-type: none"> <li>Maximum ALT and/or AST from study period</li> </ul>                                                  | Normal liver enzymes<br><br>ALT <b>OR</b> AST < 50  | Elevated liver enzymes<br><br>ALT <b>OR</b> AST ≥ 50                                            | n/a                                                              | n/a                                   |
|                                                                                                                                                                     | No record of NASH, fatty liver disease, cirrhosis   | No record of NASH, fatty liver disease, cirrhosis                                               | Diagnosis of NASH or liver disease (ICD 9: 571.8 or 571.9)       | Diagnosis of cirrhosis (ICD 9: 571.5) |
| <b>DYSLIPIDEMIA</b><br><ul style="list-style-type: none"> <li>Minimum HDL cholesterol</li> <li>Maximum LDL cholesterol, total cholesterol, triglycerides</li> </ul> | <b>HDL cholesterol</b><br>>1.6 mmol/L               | <b>HDL cholesterol</b><br>Males 1.0 to 1.6<br>Females 1.3 to 1.6                                | <b>HDL cholesterol</b><br>Males <1.0<br>Females <1.3             | n/a                                   |
|                                                                                                                                                                     | <b>LDL cholesterol</b><br><3.4 mmol/L               | <b>LDL cholesterol</b><br>3.4 to 4.0 mmol/L                                                     | <b>LDL cholesterol</b><br>>4.0 mmol/L                            |                                       |
|                                                                                                                                                                     | <b>Total cholesterol</b><br><5.2 mmol/L             | <b>Total cholesterol</b><br>5.2 to 6.1 mmol/L                                                   | <b>Total cholesterol</b><br>>6.1 mmol/L                          |                                       |
|                                                                                                                                                                     | <b>Triglycerides</b><br><1.7 mmol/L                 | <b>Triglycerides</b><br>1.7 to 2.3 mmol/L                                                       | <b>Triglycerides</b><br>>2.3 mmol/L                              |                                       |
|                                                                                                                                                                     | No statin use                                       | No statin use                                                                                   | Statin use                                                       |                                       |
| <b>DIABETES</b><br><ul style="list-style-type: none"> <li>Maximum fasting glucose, hemoglobin A1c</li> </ul>                                                        | No CPCSSN Diabetes Diagnosis <sup>3</sup>           | No CPCSSN Diabetes Diagnosis                                                                    | CPCSSN Diabetes Diagnosis                                        | n/a                                   |
|                                                                                                                                                                     | <b>Fasting glucose</b><br>< 5.6 mmol/L              | <b>Fasting glucose</b><br>5.6 to <7 mmol/L                                                      | <b>Fasting glucose</b><br>≥7 mmol/L                              |                                       |
|                                                                                                                                                                     | <b>HbA1c</b><br><6.0                                | <b>HbA1c</b><br>6.0 to <6.5                                                                     | <b>HbA1c</b><br>≥ 6.5                                            |                                       |
| <b>KIDNEY DISEASE<sup>2</sup></b><br><ul style="list-style-type: none"> <li>Minimum eGFR</li> <li>Maximum ACR</li> </ul>                                            | <b>eGFR</b><br>≥60 <sup>3</sup>                     | <b>eGFR</b><br>≥45 to <60                                                                       | <b>eGFR</b><br>30 to <45                                         | <b>eGFR</b><br><30                    |
|                                                                                                                                                                     | <b>Albumin Creatinine Ratio (ACR)</b><br><3 mg/mmol | <b>ACR</b><br>3 to 30 mg/mmol                                                                   | <b>ACR</b><br>>30 mg/mmol                                        |                                       |
| <b>HYPERTENSION</b><br><ul style="list-style-type: none"> <li>Maximum blood pressure</li> </ul>                                                                     | BP<130/85*<br><br>*BP <125/75 if CPCSSN diabetes    | For individuals classified as having CPCSSN diabetes, SBP 125 to 129.9 <b>OR</b> DBP 75 to 79.9 | For individuals classified as having CPCSSN diabetes ≥ BP 130/80 | n/a                                   |

|                                                                                                                                                                                                                                                                                                                                                                                                                                                                                                                                                                                                                                                                                                                                               |                                                        |                                                            |                                                           |                                                                                                                                                           |
|-----------------------------------------------------------------------------------------------------------------------------------------------------------------------------------------------------------------------------------------------------------------------------------------------------------------------------------------------------------------------------------------------------------------------------------------------------------------------------------------------------------------------------------------------------------------------------------------------------------------------------------------------------------------------------------------------------------------------------------------------|--------------------------------------------------------|------------------------------------------------------------|-----------------------------------------------------------|-----------------------------------------------------------------------------------------------------------------------------------------------------------|
|                                                                                                                                                                                                                                                                                                                                                                                                                                                                                                                                                                                                                                                                                                                                               |                                                        | Otherwise, SBP<br>130 to 139.9 <b>OR</b><br>DBP 85 to 89.9 | Otherwise<br>BP 140/90 (only<br>if no CPCSSN<br>diabetes) |                                                                                                                                                           |
|                                                                                                                                                                                                                                                                                                                                                                                                                                                                                                                                                                                                                                                                                                                                               | No CPCSSN<br>diagnosis of<br>hypertension <sup>3</sup> | No CPCSSN<br>diagnosis of<br>hypertension                  | CPCSSN<br>hypertension                                    |                                                                                                                                                           |
| <b>OSTEOARTHRITIS</b>                                                                                                                                                                                                                                                                                                                                                                                                                                                                                                                                                                                                                                                                                                                         |                                                        |                                                            |                                                           | CPCSSN<br>Osteoarthritis <sup>3</sup>                                                                                                                     |
| <b>CORONARY HEART<br/>DISEASE/CONGESTIVE<br/>HEART FAILURE</b>                                                                                                                                                                                                                                                                                                                                                                                                                                                                                                                                                                                                                                                                                |                                                        |                                                            |                                                           | ICD9- 402*<br>ICD9 - 410*<br>ICD9 - 411*<br>ICD9 - 412*<br>ICD9 - 413*<br>ICD9 - 414.0*<br>ICD9 - 414.8*<br>ICD9 - 414.9*<br>ICD9 - 429.2*<br>ICD9 - 428* |
| <b>CEREBROVASCULAR<br/>DISEASE</b>                                                                                                                                                                                                                                                                                                                                                                                                                                                                                                                                                                                                                                                                                                            |                                                        |                                                            |                                                           | ICD9 - 430*<br>ICD9 - 431*<br>ICD9 - 432*<br>ICD9 - 433*<br>ICD9 - 434*<br>ICD9 - 435*<br>ICD9 - 437*<br>ICD9 - 438*                                      |
| <sup>1</sup> Padwal RJ, Pajewski NM, Allison DB, Sharma AM. Using the Edmonton obesity staging system to predict mortality in a population-representative cohort of people with overweight and obesity. 2011; CMAJ. Available from: <a href="https://doi.org/10.1503/cmaj.110387">https://doi.org/10.1503/cmaj.110387</a><br><sup>2</sup> KDIGO 2013: <a href="https://www.kidney-international.org/article/S0085-2538(15)56174-7/pdf">https://www.kidney-international.org/article/S0085-2538(15)56174-7/pdf</a><br><sup>3</sup> CPCSSN Case definitions available from: <a href="http://cpcssn.ca/wp-content/uploads/2019/07/CPCSSN-Case-Definitions-v2.pdf">http://cpcssn.ca/wp-content/uploads/2019/07/CPCSSN-Case-Definitions-v2.pdf</a> |                                                        |                                                            |                                                           |                                                                                                                                                           |
